# Supplementary material for: Evolution of the complex transcription network controlling biofilm formation in Candida species
Source: eLife journal article supplement (doi:10.7554/elife.64682), 2021-04-07
Supplement: supp [file elife-64682-supp-v1.zip]

Archive with 9 entries (9 files):
- elife_poa_e64682_Figure_2_figure_supplement_1.pdf
- elife_poa_e64682_Figure_2_figure_supplement_2.pdf
- elife_poa_e64682_Figure_2_figure_supplement_3.pdf
- elife_poa_e64682_Figure_3_figure_supplement_1.pdf
- elife_poa_e64682_Figure_4_figure_supplement_1.pdf
- elife_poa_e64682_Figure_4_figure_supplement_2.pdf
- elife_poa_e64682_Figure_6_figure_supplement_1.pdf
- elife_poa_e64682_Supplementary_file_1.xlsx
- elife_poa_e64682_Transparent_Reporting_File.pdf
