# Supplementary material for: Evolution of the complex transcription network controlling biofilm formation in Candida species
Source: eLife journal article supplement (doi:10.7554/elife.64682), 2021-04-07
Supplement: supp [file elife-64682-supp-v1.zip › elife_poa_e64682_Supplementary_file_1.xlsx]

## Sheet: Supplementary File 1a
Supplementary File 1a. Biofilm formation of C. albicans and its 3 most closely related species in different media.
Biofilms were grown on silicone squares at 37°C with shaking at 200 rpm. Biofilm formation was assessed by CSLM after 48 hours of growth. Spider medium was prepared with 1% nutrient broth, 0.4% potassium phosphate and adjusted to pH 7.2. RPMI media used was RMPI 1640 with 165 mM MOPS and L-glutamine and without sodium bicarbonate (Lonza, 04-525F). YNB media was prepared with 0.67% yeast nitrogen …
Media	Carbon source	C.albicans	C.dubliniensis	C.tropicalis	C.parapsilosis
Spider	1% manitol	+	+	-	-
Spider	1% glucose	++	+	+	+
Spider	1% galactose	++	+	-	-+
RPMI	0.2% glucose	+	-	+	-
RPMI	2% glucose	++	-+	++	-+
YNB	1% glucose	+	-	?	+
YNB	2% glucose	+	-	?	?
YNB	1% galactose	+	-	?	?

## Sheet: Supplementary File 1b
Supplementary File 1b. Number of genes bound by each regulator in the four Candida species studied.
“NA”, indicates experiments that were not performed because the regulator was not tagged (C. parapsilosis Bcr1 and Flo8), or due to the absence of an ortholog (C. parapsilosis Rob1). Zeros denote experiments for which the ChIP-seq was not successful.
Regulator	C.albicans	C.dubliniensis	C.tropicalis	C.parapsilosis
Bcr1	40	4	10	NA
Brg1	98	354	0	0
Efg1	168	311	920	609
Flo8	0	0	0	NA
Ndt80	1091	957	1749	2927
Rob1	19	3	21	NA
Tec1	154	0	0	399

## Sheet: Supplementary File 1c
Supplementary File 1c. Master regulator binding to each other's upstream intergenic region.
Numbers represent the number of species in which binding was observed. The maximum possible number of species for which we have data is shown in parenthesis for each master regulator.
		Binding
	Name	Bcr1 (3)	Brg1 (3)	Efg1 (4)	Ndt80_B (4)	Rob1 (3)	Tec1 (2)
Target	Bcr1	1	2	3	4	0	1
	Brg1	0	2	3	4	0	2
	Efg1	0	1	4	4	1	2
	Flo8	0	2	1	3	0	0
	Ndt80_B	0	0	2	4	0	1
	Rob1	0	0	1	2	0	0
	Tec1	0	2	3	4	1	0

## Sheet: Supplementary File 1d
Supplementary File 1d. Strains used in this study
Name	Species	Background	Genotype	Source/Reference
SN250	C. albicans	SC5314	ura3Δ::λimm434::URA3-IRO1 ura3Δ::λimm434 arg4::hisG arg4::hisG his1::hisG his1::hisG leu2::hisG::CdHIS1 leu2::hisG::CmLEU2	Noble S.M. et al, 2010
CJN1734	C. albicans	SC5314	ura3Δ::λimm434::URA3-IRO1 ura3Δ::λimm434 arg4::hisG arg4::hisG his1::hisG his1::hisG leu2::hisG::CdHIS1 leu2::hisG::CmLEU2 BRG1-13XMyc-FRT/BRG1	Nobile C.J. et al, 2012
CJN1748	C. albicans	SC5314	ura3Δ::λimm434::URA3-IRO1 ura3Δ::λimm434 arg4::hisG arg4::hisG his1::hisG his1::hisG leu2::hisG::CdHIS1 leu2::hisG::CmLEU2 NDT80-13XMyc-FRT/NDT80	Nobile C.J. et al, 2012
CJN1781	C. albicans	SC5314	ura3Δ::λimm434::URA3-IRO1 ura3Δ::λimm434 arg4::hisG arg4::hisG his1::hisG his1::hisG leu2::hisG::CdHIS1 leu2::hisG::CmLEU2 EFG1-13XMyc-FRT/EFG1	Nobile C.J. et al, 2012
CJN1787	C. albicans	SC5314	ura3Δ::λimm434::URA3-IRO1 ura3Δ::λimm434 arg4::hisG arg4::hisG his1::hisG his1::hisG leu2::hisG::CdHIS1 leu2::hisG::CmLEU2 BCR1-13XMyc-FRT/BCR1	Nobile C.J. et al, 2012
CJN1865	C. albicans	SC5314	ura3Δ::λimm434::URA3-IRO1 ura3Δ::λimm434 arg4::hisG arg4::hisG his1::hisG his1::hisG leu2::hisG::CdHIS1 leu2::hisG::CmLEU2 TEC1-13XMyc-FRT/TEC1	Nobile C.J. et al, 2012
CJN2208	C. albicans	SC5314	ura3Δ::λimm434::URA3-IRO1 ura3Δ::λimm434 arg4::hisG arg4::hisG his1::hisG his1::hisG leu2::hisG::CdHIS1 leu2::hisG::CmLEU2 ROB1-7XMyc-FRT/ROB1	Nobile C.J. et al, 2012
CKB36	C. albicans	SC5314	ura3Δ::λimm434::URA3-IRO1 ura3Δ::λimm434 arg4::hisG arg4::hisG his1::hisG his1::hisG leu2::hisG::CdHIS1 leu2::hisG::CmLEU2 FLO8-13XMyc-FRT/FLO8	Nobile C.J. et al, 2012
TF022	C. albicans	SC5314	arg4Δ/arg4Δ leu2Δ/leu2Δ his1Δ/his1Δ URA3/ura3Δ::imm434 IRO1/iro1Δ::imm434 brg1Δ::HIS1/brg1Δ::LEU2	Homann O. R., et al, 2009
TF095	C. albicans	SC5314	arg4Δ/arg4Δ leu2Δ/leu2Δ his1Δ/his1Δ URA3/ura3Δ::imm434 IRO1/iro1Δ::imm434 ndt80Δ::HIS1/ndt80Δ::LEU2	Homann O. R., et al, 2009
TF110	C. albicans	SC5314	arg4Δ/arg4Δ leu2Δ/leu2Δ his1Δ/his1Δ URA3/ura3Δ::imm434 IRO1/iro1Δ::imm434 rob1Δ::HIS1/rob1Δ::LEU2	Homann O. R., et al, 2009
TF115	C. albicans	SC5314	arg4Δ/arg4Δ leu2Δ/leu2Δ his1Δ/his1Δ URA3/ura3Δ::imm434 IRO1/iro1Δ::imm434 tec1Δ::HIS1/tec1Δ::LEU2	Homann O. R., et al, 2009
TF137	C. albicans	SC5314	arg4Δ/arg4Δ leu2Δ/leu2Δ his1Δ/his1Δ URA3/ura3Δ::imm434 IRO1/iro1Δ::imm434 bcr1Δ::HIS1/bcr1Δ::LEU2	Homann O. R., et al, 2009
TF156	C. albicans	SC5314	arg4Δ/arg4Δ leu2Δ/leu2Δ his1Δ/his1Δ URA3/ura3Δ::imm434 IRO1/iro1Δ::imm434 efg1Δ::HIS1/efg1Δ::LEU2	Homann O. R., et al, 2009
CD36	C. dubliniensis	CD36	WT	Derek Sullivan
CEM091	C. dubliniensis	CD36	his1Δ::HIS1 Calb/his1Δ::FRT leu2Δ::LEU2 Calb/leu2Δ::FRT arg4::FRT/arg4::FRT	Mancera E. et al, 2019
CEM100	C. dubliniensis	CD36	his1Δ::FRT/his1Δ::FRT leu2Δ::FRT/leu2Δ::FRT arg4::FRT/arg4::FRT bcr1Δ::HIS1 Calb/bcr1Δ::LEU2 Calb	This study
CEM101	C. dubliniensis	CD36	his1Δ::FRT/his1Δ::FRT leu2Δ::FRT/leu2Δ::FRT arg4::FRT/arg4::FRT brg1Δ::HIS1 Calb/brg1Δ::LEU2 Calb	This study
CEM102	C. dubliniensis	CD36	his1Δ::FRT/his1Δ::FRT leu2Δ::FRT/leu2Δ::FRT arg4::FRT/arg4::FRT efg1Δ::HIS1 Calb/efg1Δ::LEU2 Calb	This study
CEM103	C. dubliniensis	CD36	his1Δ::FRT/his1Δ::FRT leu2Δ::FRT/leu2Δ::FRT arg4::FRT/arg4::FRT ndt80Δ::HIS1 Calb/ ndt80Δ::LEU2 Calb	This study
CEM104	C. dubliniensis	CD36	his1Δ::FRT/his1Δ::FRT leu2Δ::FRT/leu2Δ::FRT arg4::FRT/arg4::FRT rob1Δ::HIS1 Calb/rob1Δ::LEU2 Calb	This study
CEM105	C. dubliniensis	CD36	his1Δ::FRT/his1Δ::FRT leu2Δ::FRT/leu2Δ::FRT arg4::FRT/arg4::FRT tec1Δ::HIS1 Calb/tec1Δ::LEU2 Calb	This study
CEM106	C. dubliniensis	CD36	his1Δ::FRT/his1Δ::FRT leu2Δ::FRT/leu2Δ::FRT arg4::FRT/arg4::FRT bcr1Δ::HIS1 Calb/bcr1Δ::LEU2 Calb	This study
CEM107	C. dubliniensis	CD36	his1Δ::FRT/his1Δ::FRT leu2Δ::FRT/leu2Δ::FRT arg4::FRT/arg4::FRT brg1Δ::HIS1 Calb/brg1Δ::LEU2 Calb	This study
CEM108	C. dubliniensis	CD36	his1Δ::FRT/his1Δ::FRT leu2Δ::FRT/leu2Δ::FRT arg4::FRT/arg4::FRT efg1Δ::HIS1 Calb/efg1Δ::LEU2 Calb	This study
CEM109	C. dubliniensis	CD36	his1Δ::FRT/his1Δ::FRT leu2Δ::FRT/leu2Δ::FRT arg4::FRT/arg4::FRT ndt80Δ::HIS1 Calb/ ndt80Δ::LEU2 Calb	This study
CEM110	C. dubliniensis	CD36	his1Δ::FRT/his1Δ::FRT leu2Δ::FRT/leu2Δ::FRT arg4::FRT/arg4::FRT rob1Δ::HIS1 Calb/rob1Δ::LEU2 Calb	This study
CEM111	C. dubliniensis	CD36	his1Δ::FRT/his1Δ::FRT leu2Δ::FRT/leu2Δ::FRT arg4::FRT/arg4::FRT tec1Δ::HIS1 Calb/tec1Δ::LEU2 Calb	This study
CEM339	C. dubliniensis	CD36	his1Δ::HIS1 Calb/his1Δ::FRT leu2Δ::LEU2 Calb/leu2Δ::FRT arg4::FRT/arg4::FRT BCR1/BCR1-13Myc-FRT	This study
CEM340	C. dubliniensis	CD36	his1Δ::HIS1 Calb/his1Δ::FRT leu2Δ::LEU2 Calb/leu2Δ::FRT arg4::FRT/arg4::FRT BRG1/BRG1-13Myc-FRT	This study
CEM341	C. dubliniensis	CD36	his1Δ::HIS1 Calb/his1Δ::FRT leu2Δ::LEU2 Calb/leu2Δ::FRT arg4::FRT/arg4::FRT EFG1/EFG1-13Myc-FRT	This study
CEM342	C. dubliniensis	CD36	his1Δ::HIS1 Calb/his1Δ::FRT leu2Δ::LEU2 Calb/leu2Δ::FRT arg4::FRT/arg4::FRT NDT80/NDT80-13Myc-FRT	This study
CEM343	C. dubliniensis	CD36	his1Δ::HIS1 Calb/his1Δ::FRT leu2Δ::LEU2 Calb/leu2Δ::FRT arg4::FRT/arg4::FRT ROB1/ROB1-13Myc-FRT	This study
CEM344	C. dubliniensis	CD36	his1Δ::HIS1 Calb/his1Δ::FRT leu2Δ::LEU2 Calb/leu2Δ::FRT arg4::FRT/arg4::FRT TEC1/TEC1-13Myc-FRT	This study
CEM365	C. dubliniensis	CD36	his1Δ::FRT/his1Δ::FRT leu2Δ::FRT/leu2Δ::FRT arg4::FRT/arg4::FRT flo8Δ::HIS1 Calb/flo8Δ::LEU2 Calb	This study
CEM366	C. dubliniensis	CD36	his1Δ::FRT/his1Δ::FRT leu2Δ::FRT/leu2Δ::FRT arg4::FRT/arg4::FRT flo8Δ::HIS1 Calb/flo8Δ::LEU2 Calb	This study
CEM432	C. dubliniensis	CD36	his1Δ::HIS1 Calb/his1Δ::FRT leu2Δ::LEU2 Calb/leu2Δ::FRT arg4::FRT/arg4::FRT FLO8/FLO8-13Myc-FRT	This study
CLIB214	C. parapsilosis	CLIB214	WT	Geraldine Butler
CEM385	C. parapsilosis	CLIB214	leu2::FRT/leu2::FRT his1::FRT/his1::FRT brg1::LEU2/BRG1::MYC::HIS1	This study
CEM391	C. parapsilosis	CLIB214	leu2::FRT/leu2::FRT his1::FRT/his1::FRT efg1::LEU2/EFG1::MYC::HIS1	This study
CEM401	C. parapsilosis	CLIB214	leu2::FRT/leu2::FRT his1::FRT/his1::FRT ndt80::LEU2/NDT80::MYC::HIS1	This study
CEM407	C. parapsilosis	CLIB214	leu2::FRT/leu2::FRT his1::FRT/his1::FRT tec1::LEU2/TEC1::MYC::HIS1	This study
CEM010	C. tropicalis	MYA3404	WT	ATCC
CEM300	C. tropicalis	MYA3404	leu2Δ::Calb LEU2/leu2Δ::FRT	Mancera E. et al, 2019
CEM225	C. tropicalis	MYA3404	leu2Δ::FRT/leu2Δ::FRT bcr1Δ::LEU2 Calb/bcr1Δ::HYG	This study
CEM226	C. tropicalis	MYA3404	leu2Δ::FRT/leu2Δ::FRT bcr1Δ::LEU2 Calb/bcr1Δ::HYG	This study
CEM235	C. tropicalis	MYA3404	leu2Δ::FRT/leu2Δ::FRT brg1Δ::LEU2 Calb/brg1Δ::HYG	This study
CEM236	C. tropicalis	MYA3404	leu2Δ::FRT/leu2Δ::FRT brg1Δ::LEU2 Calb/brg1Δ::HYG	This study
CEM237	C. tropicalis	MYA3404	leu2Δ::FRT/leu2Δ::FRT ndt80Δ::LEU2 Calb/ndt80Δ::HYG	This study
CEM238	C. tropicalis	MYA3404	leu2Δ::FRT/leu2Δ::FRT ndt80Δ::LEU2 Calb/ndt80Δ::HYG	This study
CEM241	C. tropicalis	MYA3404	leu2Δ::FRT/leu2Δ::FRT tec1Δ::LEU2 Calb/tec1Δ::HYG	This study
CEM242	C. tropicalis	MYA3404	leu2Δ::FRT/leu2Δ::FRT tec1Δ::LEU2 Calb/tec1Δ::HYG	This study
CEM279	C. tropicalis	MYA3404	leu2Δ::FRT/leu2Δ::FRT efg1Δ::LEU2 Calb/efg1::HYG	This study
CEM280	C. tropicalis	MYA3404	leu2Δ::FRT/leu2Δ::FRT efg1Δ::LEU2 Calb/efg1::HYG	This study
CEM283	C. tropicalis	MYA3404	leu2Δ::FRT/leu2Δ::FRT efg1Δ::LEU2 Calb/EFG1-13Myc-FRT	This study
CEM284	C. tropicalis	MYA3404	leu2Δ::FRT/leu2Δ::FRT efg1Δ::LEU2 Calb/EFG1-13Myc-FRT	This study
CEM323	C. tropicalis	MYA3404	leu2Δ::FRT/leu2Δ::FRT rob1Δ full ORF::LEU2 Calb/rob1Δ::HYG	This study
CEM324	C. tropicalis	MYA3404	leu2Δ::FRT/leu2Δ::FRT rob1Δ full ORF::LEU2 Calb/rob1Δ::HYG	This study
CEM355	C. tropicalis	MYA3404	leu2Δ::Calb LEU2/leu2Δ::FRT BCR1/BCR1-13Myc-FRT	This study
CEM356	C. tropicalis	MYA3404	leu2Δ::Calb LEU2/leu2Δ::FRT BRG1/BRG1-13Myc-FRT	This study
CEM357	C. tropicalis	MYA3404	leu2Δ::Calb LEU2/leu2Δ::FRT EFG1/EFG1-13Myc-FRT	This study
CEM358	C. tropicalis	MYA3404	leu2Δ::Calb LEU2/leu2Δ::FRT NDT80/NDT80-13Myc-FRT	This study
CEM359	C. tropicalis	MYA3404	leu2Δ::Calb LEU2/leu2Δ::FRT ROB1/ROB1-13Myc-FRT	This study
CEM360	C. tropicalis	MYA3404	leu2Δ::Calb LEU2/leu2Δ::FRT TEC1/TEC1-13Myc-FRT	This study
CEM367	C. tropicalis	MYA3404	leu2Δ::FRT/leu2Δ::FRT flo8Δ::LEU2 Calb/flo8Δ::HYG	This study
CEM368	C. tropicalis	MYA3404	leu2Δ::FRT/leu2Δ::FRT flo8Δ::LEU2 Calb/flo8Δ::HYG	This study
CEM429	C. tropicalis	MYA3404	leu2Δ::Calb LEU2/leu2Δ::FRT FLO8/FLO8-13Myc-FRT	This study
NRRL Y-11826	C. lusitaniae	NRRL Y-11826		Phaff collection
NRRL Y-7426	D. hansenii	NRRL Y-7426		Phaff collection
NRRL YB-4239	L. elongisporus	NRRL YB-4239		Phaff collection
NRRL Y-17104	P. stipitis	NRRL Y-17104		Nocedal I. et al, 2017
NRRL Y-324	M. guilliermondii	NRRL Y-324		NRRL collection
NRRL Y-1498	C. tenuis	NRRL Y-1498		NRRL collection
NRRL Y-27907	S. passalidarum	NRRL Y-27907
NRRL Y-1933	H. burtonii	NRRL Y-1933
NRRL Y-4993	M. bicuspidata	NRRL Y-4993		NRRL collection
L7554/TBR1	S. cerevisiae	Sigma1278b	ura3-52 his3::hisG leu2::hisG	Gerald R. Fink
CBS138	C. glabrata	CBS138		Sheena Singh-Babak
