# Supplementary figures and images for: Evolution of the complex transcription network controlling biofilm formation in Candida species
Source: eLife journal article supplement (doi:10.7554/elife.64682), 2021-04-07

Figure 2-figure supplement 2

A

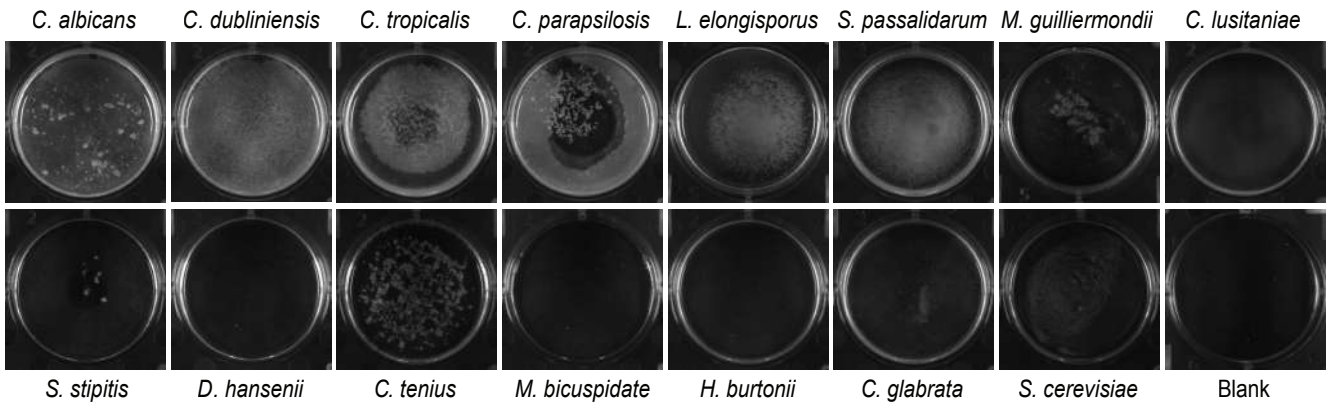

B

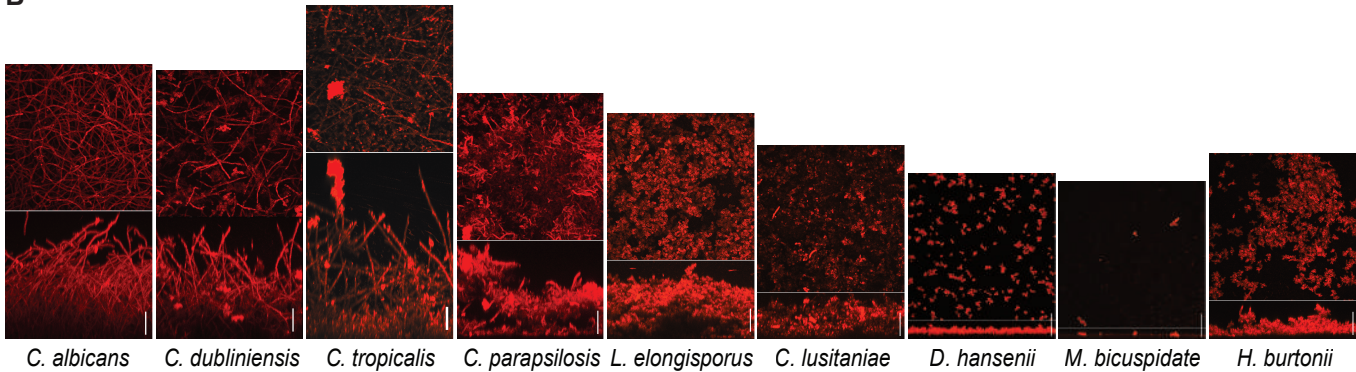

C

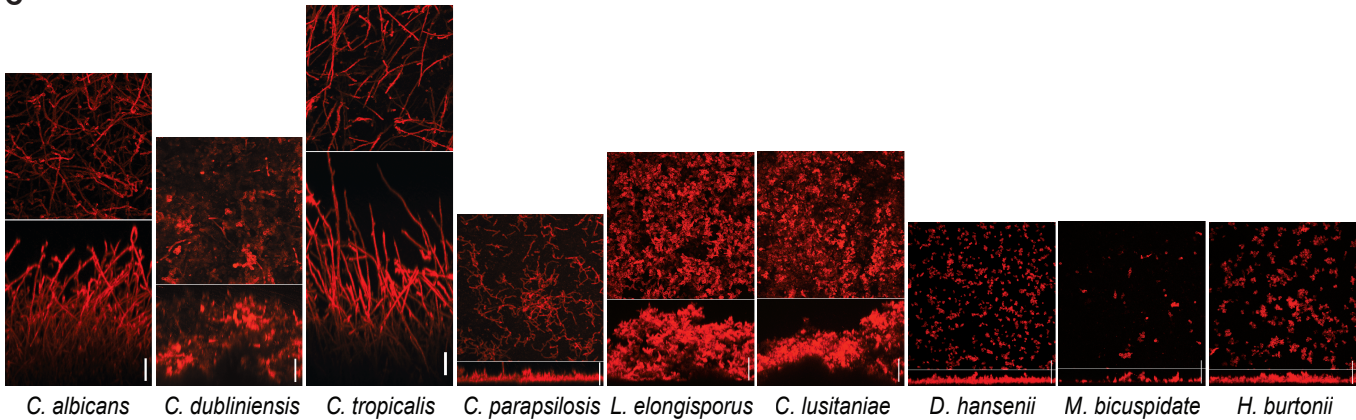

Supplement: supp [file elife-64682-supp-v1.zip]

Figure 2-figure supplement 1

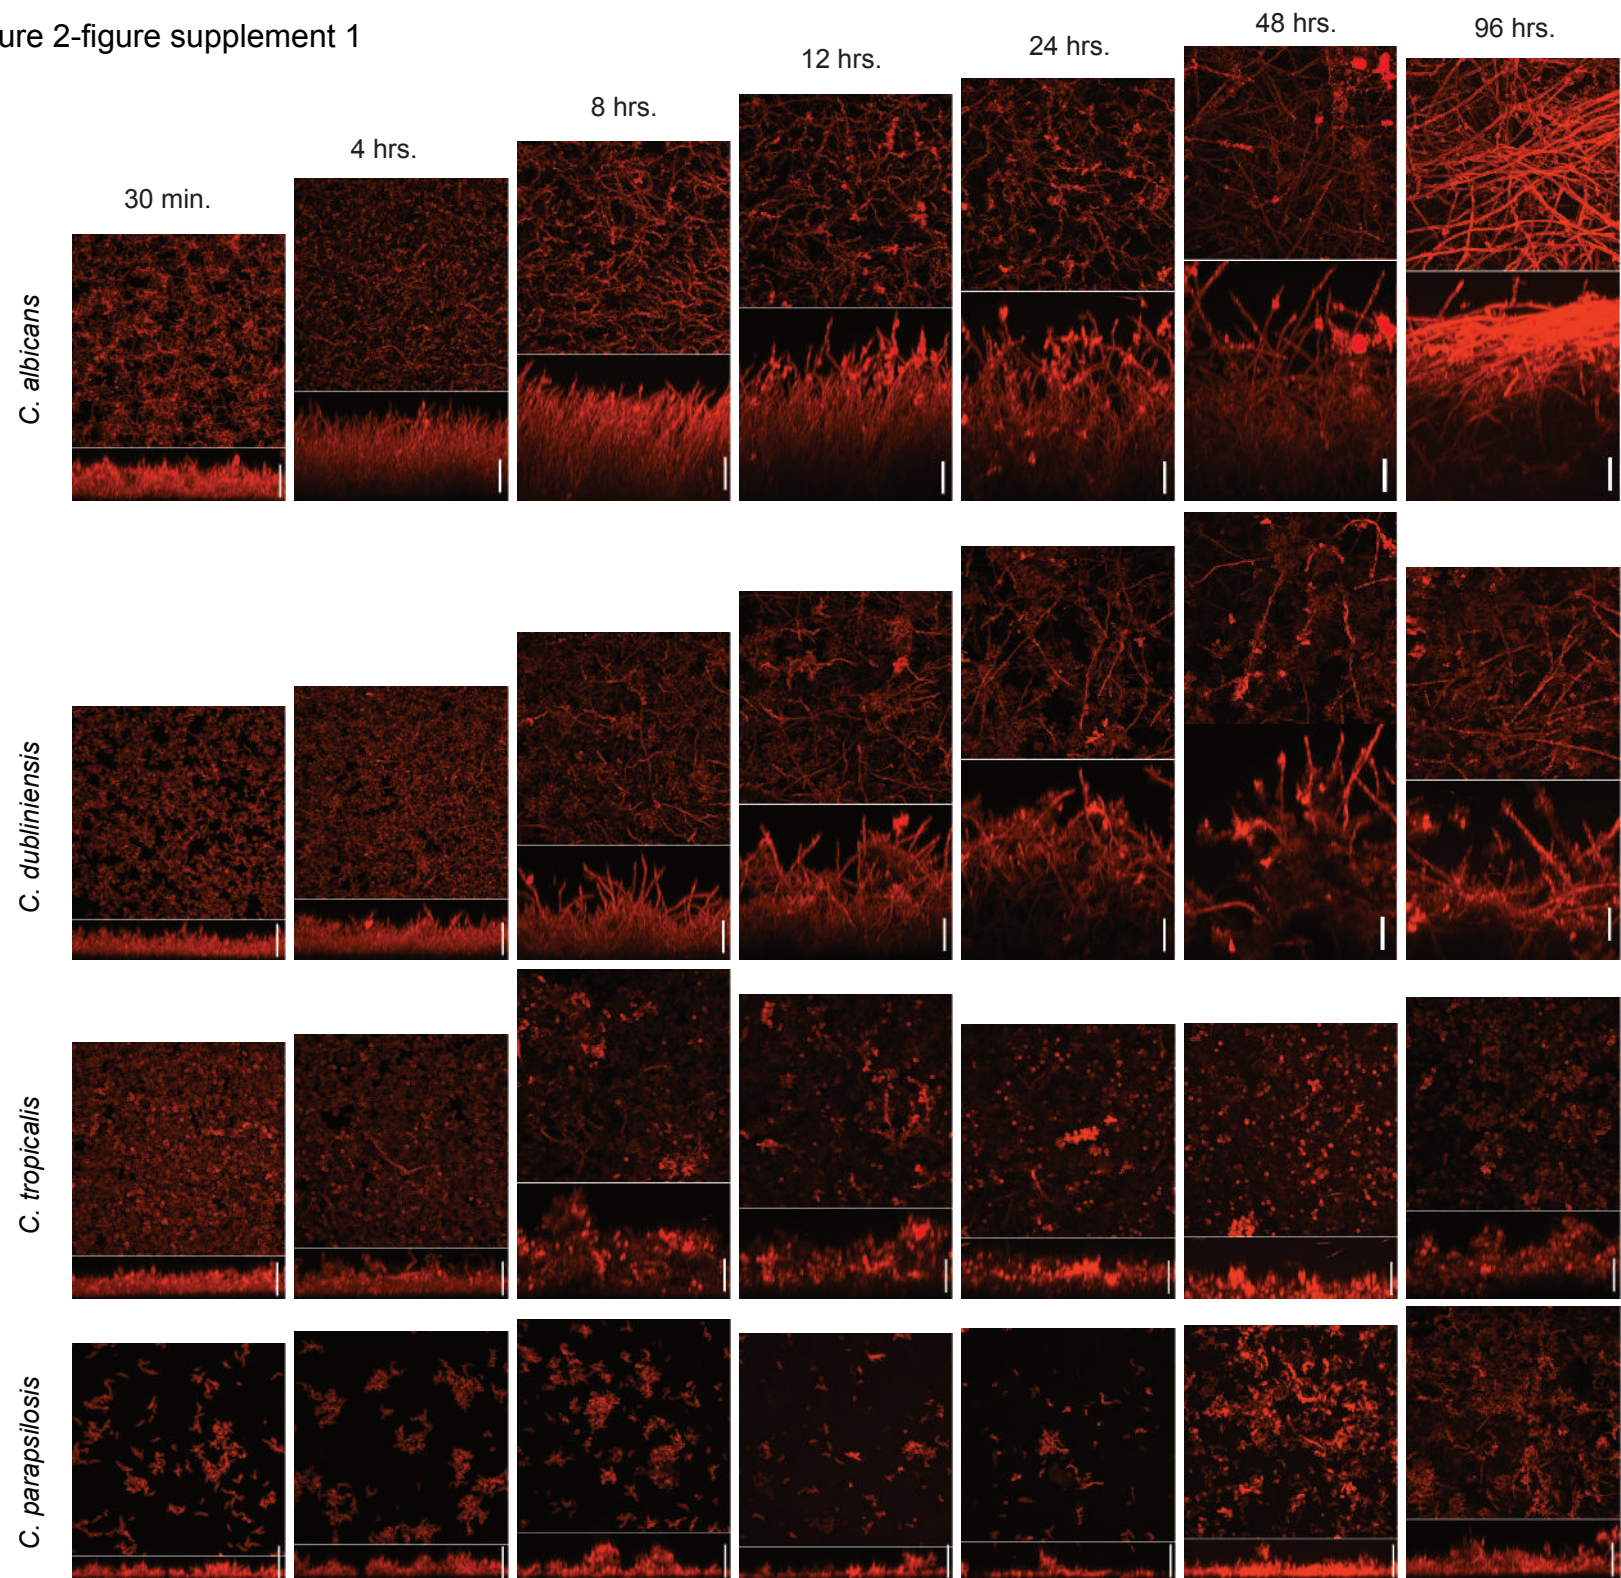

Supplement: supp [file elife-64682-supp-v1.zip › elife_poa_e64682_Figure_2_figure_supplement_1.pdf]

Figure 2-figure supplement 3

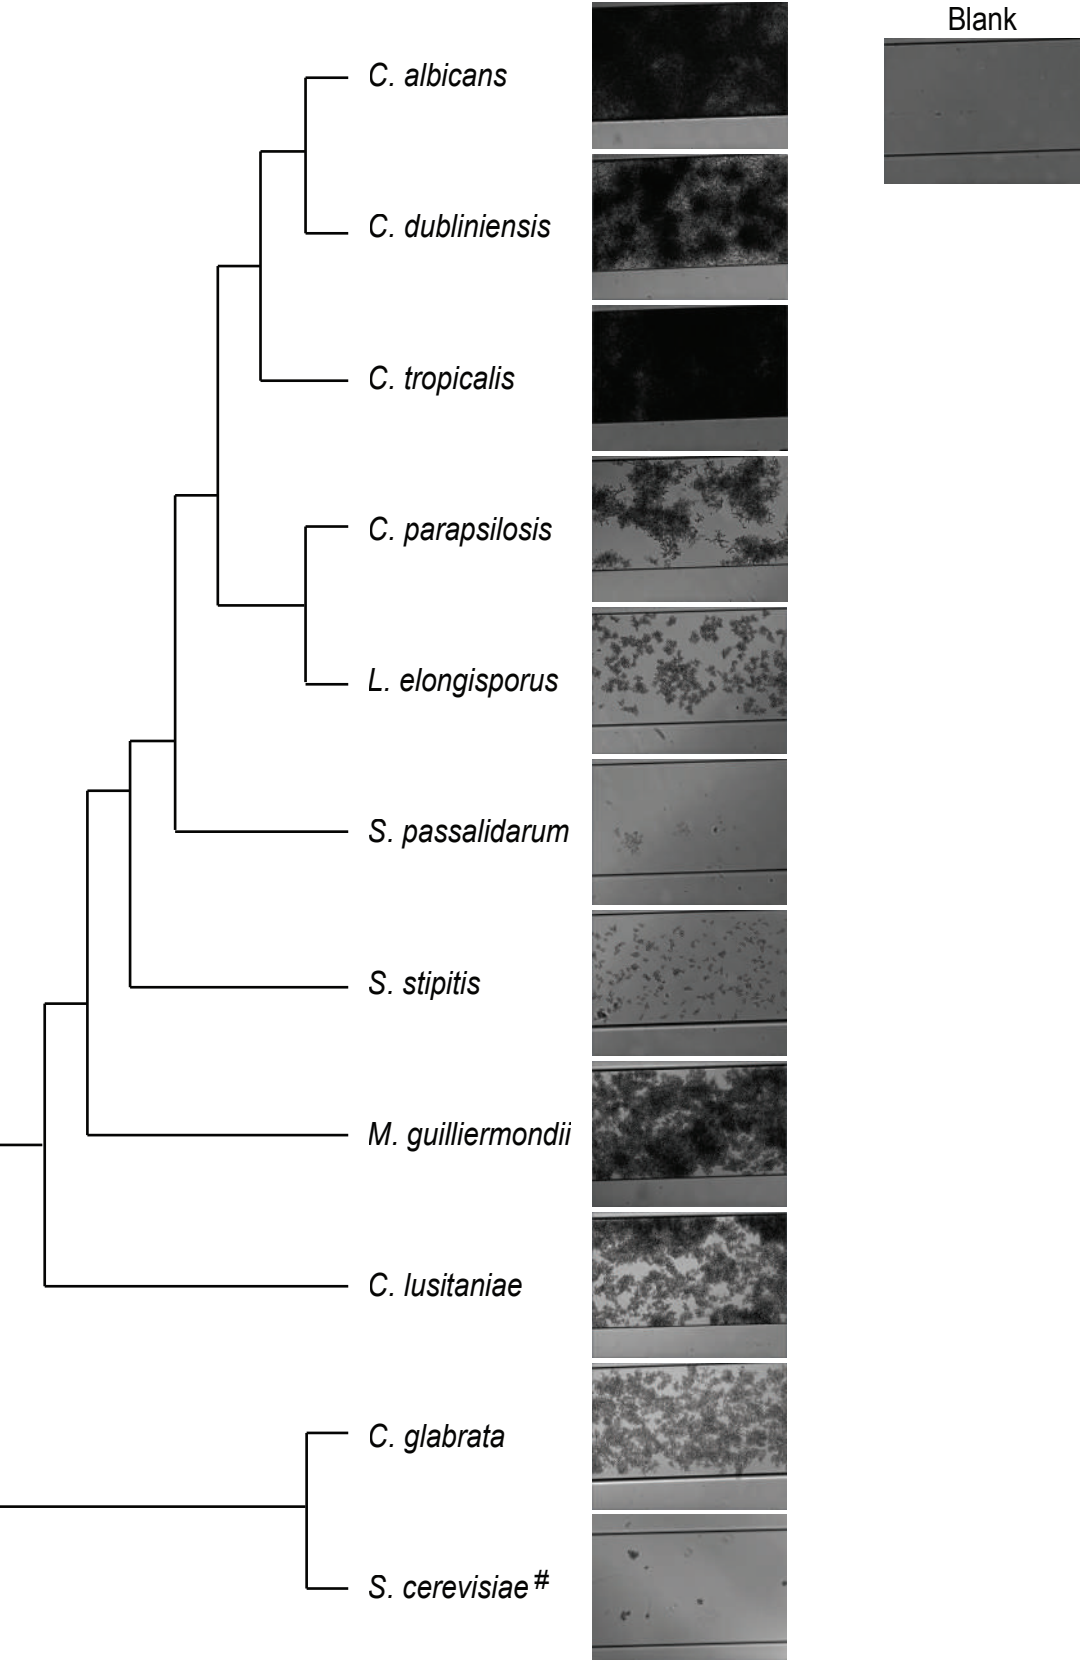

Supplement: supp [file elife-64682-supp-v1.zip › elife_poa_e64682_Figure_2_figure_supplement_3.pdf]

Figure 3-figure supplement 1

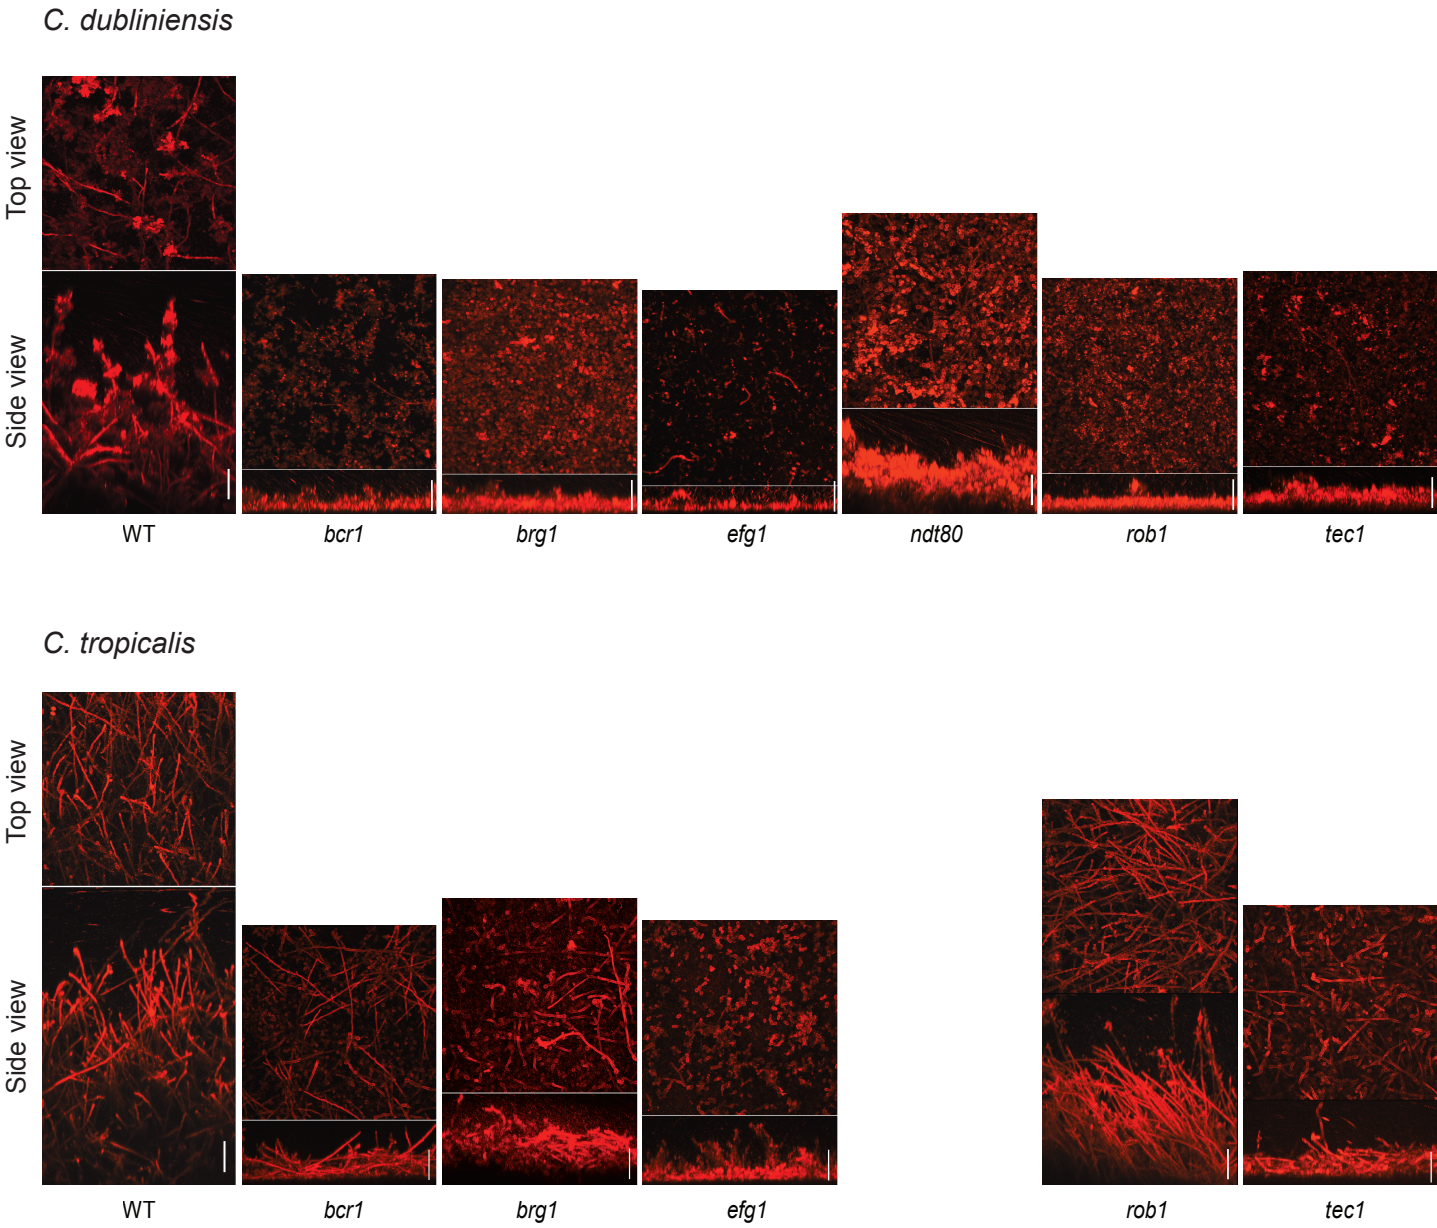

Supplement: supp [file elife-64682-supp-v1.zip › elife_poa_e64682_Figure_3_figure_supplement_1.pdf]

Figure 4-figure supplement 1

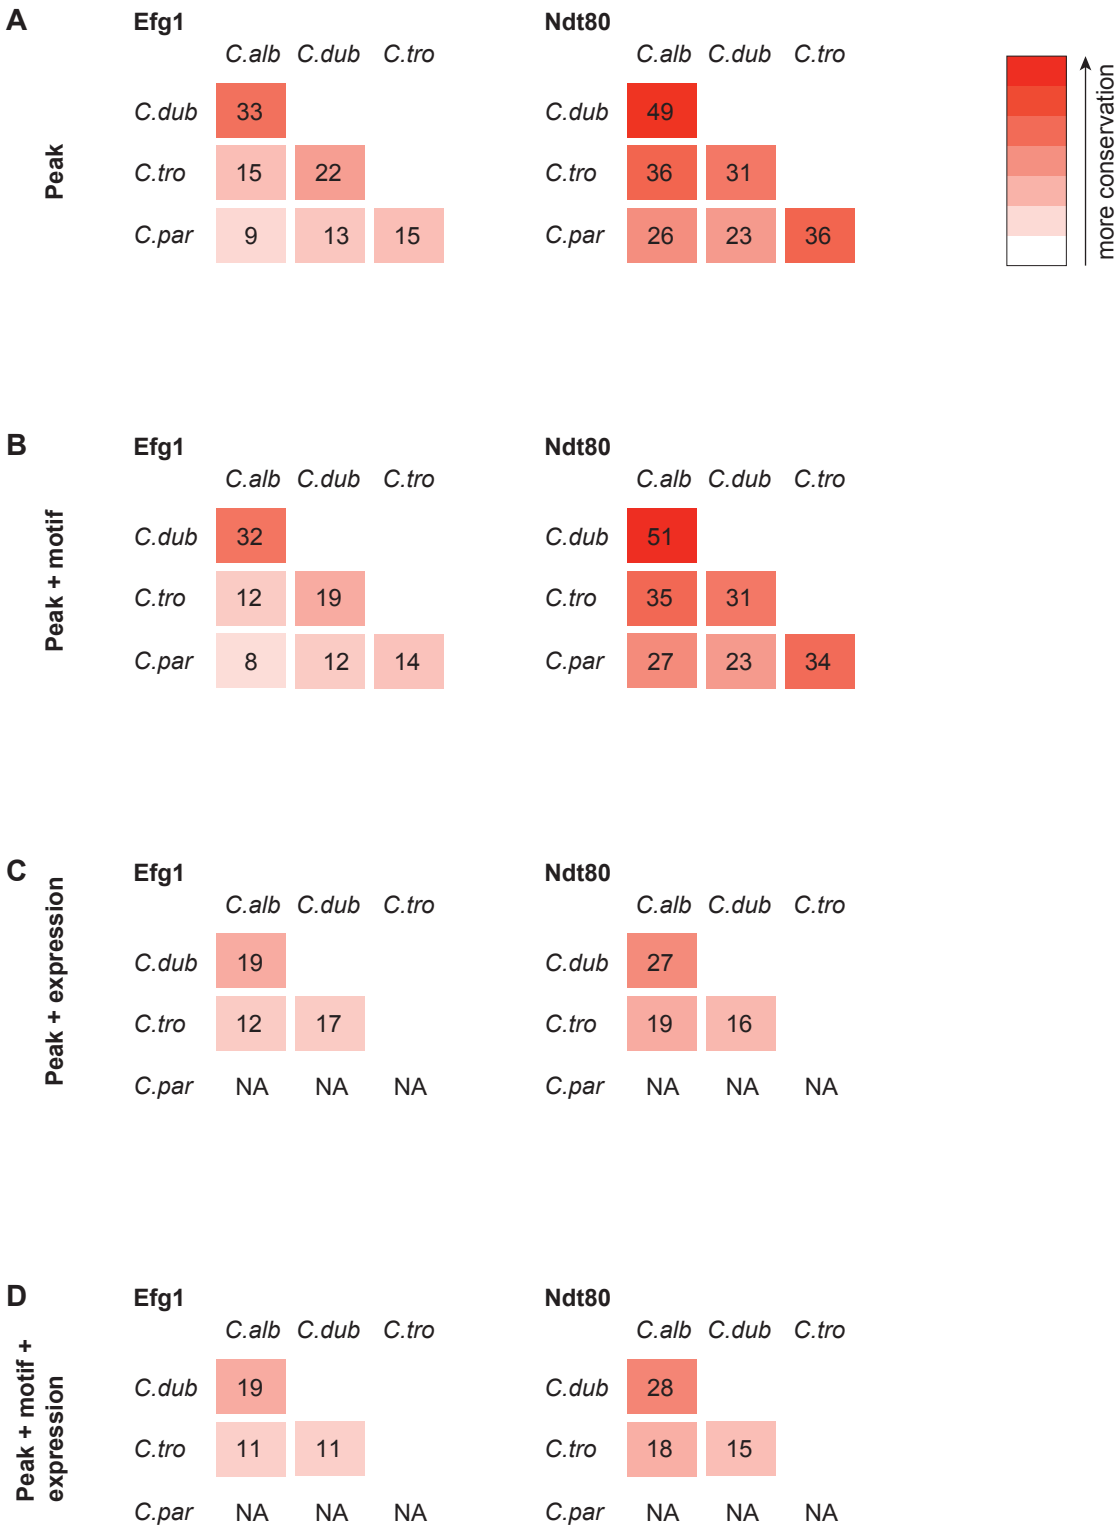

Supplement: supp [file elife-64682-supp-v1.zip › elife_poa_e64682_Figure_4_figure_supplement_1.pdf]

Figure 4-figure supplement 2

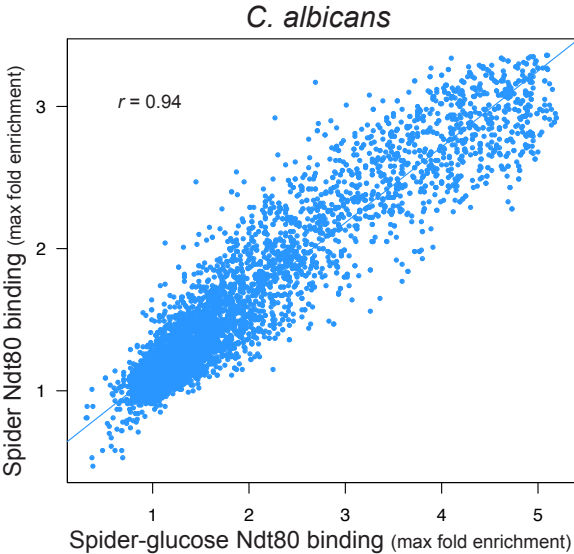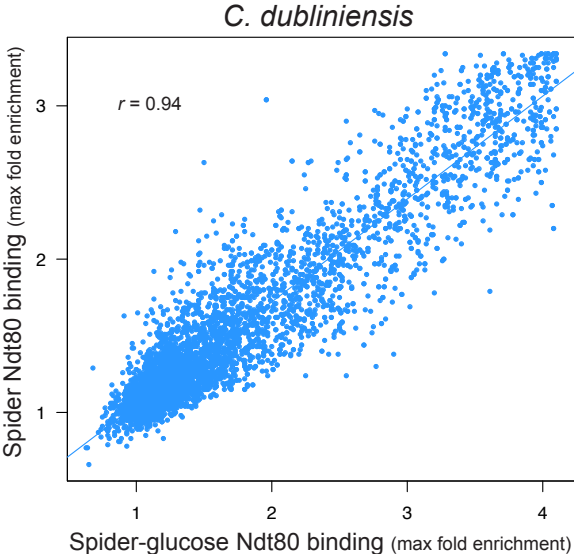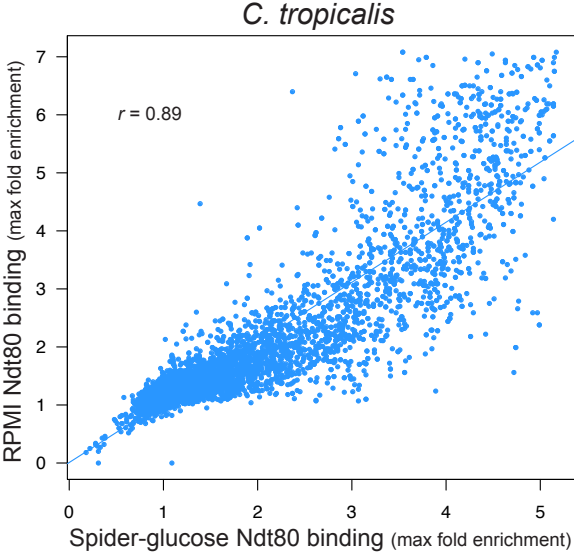

Supplement: supp [file elife-64682-supp-v1.zip › elife_poa_e64682_Figure_4_figure_supplement_2.pdf]

Figure 6-figure supplement 1

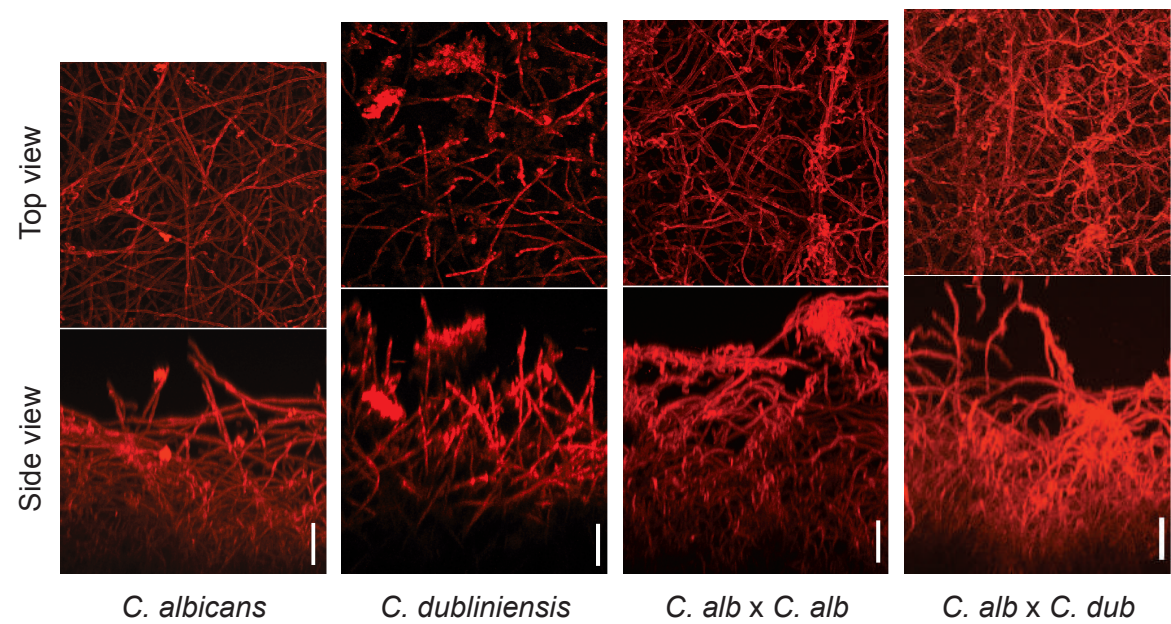

Supplement: supp [file elife-64682-supp-v1.zip › elife_poa_e64682_Figure_6_figure_supplement_1.pdf]
